# Supplementary material
Source: PubMed Central journal article supplement (PMC5725393)
Supplement: NIHMS923699-supplement-supplement_1.pdf [file NIHMS923699-supplement-supplement_1.pdf]

**Cell, Volume 164**

**Supplemental Information**

**Communication in Neural Circuits:  
Tools, Opportunities, and Challenges**

**Talia N. Lerner, Li Ye, and Karl Deisseroth**

## Table S1. Tools for Neural Circuit Mapping

Selected techniques currently available for neural circuit mapping and covering a broad range of capabilities are summarized, with attention given both to major applications/advantages (particularly in terms of characterizing IODEs) and to major caveats. The terms IDE and ODE are defined only relative to the cell population of interest; hence transsynaptic markers are particularly useful in this regard for identifying the inputs to a genetically and anatomically specified starter cell population.

| Method                | Connectivity Information/<br>Tracing<br>Directionality | Mechanism/<br>Marker                                                                                                          | Properties Checklist                                                                |                          |                    |                                 |                           |                          | Species<br>Compatibility                          | Major<br>Applications/<br>Advantages                                                                                                                                                                | Major Caveats                                                                                                                                                                                                                                                       | References                                                                                                                                                                                                                                            |                                             |
|-----------------------|--------------------------------------------------------|-------------------------------------------------------------------------------------------------------------------------------|-------------------------------------------------------------------------------------|--------------------------|--------------------|---------------------------------|---------------------------|--------------------------|---------------------------------------------------|-----------------------------------------------------------------------------------------------------------------------------------------------------------------------------------------------------|---------------------------------------------------------------------------------------------------------------------------------------------------------------------------------------------------------------------------------------------------------------------|-------------------------------------------------------------------------------------------------------------------------------------------------------------------------------------------------------------------------------------------------------|---------------------------------------------|
|                       |                                                        |                                                                                                                               | Long-range<br>Connections                                                           | Cell-type<br>specificity | Trans-<br>synaptic | Mono-<br>synaptic<br>Restricted | Single Cell<br>Resolution | Synapse<br>Visualization |                                                   |                                                                                                                                                                                                     |                                                                                                                                                                                                                                                                     |                                                                                                                                                                                                                                                       |                                             |
| <b>Golgi staining</b> | Detailed local cell morphology                         | Silver precipitate                                                                                                            |                                                                                     |                          |                    |                                 |                           | ✓                        | widely compatible                                 | <ul style="list-style-type: none"> <li>Complete neuronal morphology and fine structure (e.g. spines) are visible</li> <li>Sparse labeling allows single neurons to be distinguished</li> </ul>      | <ul style="list-style-type: none"> <li>Only sparse labeling is useful</li> <li>Staining can only be applied to post-fixed samples</li> <li>Difficult to establish connectivity patterns (esp. long-range)</li> </ul>                                                | Ranjan and Mallick, 2010 (modern updates)                                                                                                                                                                                                             |                                             |
| <b>Dyes</b>           | <b>DIX Lipophilic Tracers</b>                          | Non-specific membrane tracing                                                                                                 |                                                                                     |                          |                    |                                 |                           |                          |                                                   | <ul style="list-style-type: none"> <li>Compatible with tracing in post-fixed brains as well as with live tissue imaging</li> <li>Efficient transport via membrane diffusion</li> </ul>              | <ul style="list-style-type: none"> <li>No cell type specificity</li> <li>No directional specificity for tracing</li> </ul>                                                                                                                                          | Honig and Hume, 1989                                                                                                                                                                                                                                  |                                             |
|                       | <b>Dextran Amines</b>                                  | Some anterograde vs retrograde specificity using different mW dextrans leading to preferential uptake by cell bodies vs axons | Fluorescent dye (variety of wavelengths available) incorporated into cell membranes |                          |                    |                                 |                           |                          |                                                   | <ul style="list-style-type: none"> <li>Wide variety of marker conjugates</li> <li>Variety of MWs available to help achieve directional specificity</li> <li>Can be used to identify ODEs</li> </ul> | <ul style="list-style-type: none"> <li>No cell type specificity</li> </ul>                                                                                                                                                                                          | Reiner et al., 2000                                                                                                                                                                                                                                   |                                             |
|                       | <b>FluoroGold</b>                                      | Retrograde (axonal uptake)                                                                                                    | UV excitation gives gold or blue emission depending on pH                           | ✓                        |                    |                                 |                           |                          | ✓ (sparse labeling can allow single cell tracing) | widely compatible                                                                                                                                                                                   | <ul style="list-style-type: none"> <li>Efficient uptake by axons</li> <li>Can be used to identify ODEs</li> <li>Visualization can be enhanced by immunostaining</li> <li>Compatible with EM for ultrastructural studies</li> </ul>                                  | <ul style="list-style-type: none"> <li>No cell type specificity</li> <li>One color option</li> <li>High diffusibility can make local injections difficult</li> </ul>                                                                                  | Naumann et al., 2000                        |
|                       | <b>Retrobeads</b>                                      | Retrograde (axonal uptake)                                                                                                    | Latex microbeads used to deliver red or green fluorescent dyes                      |                          |                    |                                 |                           |                          |                                                   |                                                                                                                                                                                                     | <ul style="list-style-type: none"> <li>Limited local spread of beads allows local connectivity mapping or very precise ODE tracing</li> <li>Beads are trafficked quickly, yet are non-toxic, allowing a very wide range of survival times post-injection</li> </ul> | <ul style="list-style-type: none"> <li>No cell type specificity</li> <li>Punctate appearance can make cell ID difficult</li> <li>No labeling of cell morphology</li> <li>Less efficient axonal uptake than other options (e.g. FluoroGold)</li> </ul> | Katz et al., 1984<br>Katz and Iarocci, 1990 |

Table S1. Tools for Neural Circuit Mapping 2 of 5

| Method          | Connectivity Information/<br>Tracing Directionality                             | Mechanism/<br>Marker                                                                  | Properties Checklist                                                       |                       |                                                                              |                          |                                                     |                                                     | Species Compatibility                                                                                                                                                                                                                                                                                                                                                                          | Major Applications/<br>Advantages                                                                                                                                                    | Major Caveats                                                                                                                                                                               | References                 |
|-----------------|---------------------------------------------------------------------------------|---------------------------------------------------------------------------------------|----------------------------------------------------------------------------|-----------------------|------------------------------------------------------------------------------|--------------------------|-----------------------------------------------------|-----------------------------------------------------|------------------------------------------------------------------------------------------------------------------------------------------------------------------------------------------------------------------------------------------------------------------------------------------------------------------------------------------------------------------------------------------------|--------------------------------------------------------------------------------------------------------------------------------------------------------------------------------------|---------------------------------------------------------------------------------------------------------------------------------------------------------------------------------------------|----------------------------|
|                 |                                                                                 |                                                                                       | Long-range Connections                                                     | Cell-type specificity | Trans-synaptic                                                               | Mono-synaptic Restricted | Single Cell Resolution                              | Synapse Visualization                               |                                                                                                                                                                                                                                                                                                                                                                                                |                                                                                                                                                                                      |                                                                                                                                                                                             |                            |
| Tracer Proteins | HRP                                                                             | Retrograde (axonal uptake)                                                            | Diaminobenzidine (DAB) reaction                                            |                       |                                                                              |                          |                                                     |                                                     |                                                                                                                                                                                                                                                                                                                                                                                                | <ul style="list-style-type: none"> <li>One component system</li> <li>Can be used to identify ODEs</li> </ul>                                                                         | <ul style="list-style-type: none"> <li>No cell type specificity</li> <li>One staining option</li> </ul>                                                                                     | LaVail and LaVail, 1972    |
|                 | WGA                                                                             | Retrograde (transsynaptic) and anterograde (transsynaptic): specific in some contexts |                                                                            |                       |                                                                              | ✓                        |                                                     |                                                     |                                                                                                                                                                                                                                                                                                                                                                                                | <ul style="list-style-type: none"> <li>Transsynaptic labeling highly efficient</li> <li>Can be used to identify IDE or ODEs</li> </ul>                                               | <ul style="list-style-type: none"> <li>Transsynaptic labeling is not highly efficient</li> <li>Direction of transsynaptic labeling can be mixed, variable, and circuit-dependent</li> </ul> | Schwab et al., 1978        |
|                 | PHA-L                                                                           | Anterograde (transsynaptic)                                                           | Fluorophore, biotin, HRP, cre or other marker conjugated to tracer protein | ✓                     | ✓ (optionally compatible with viral/genetic techniques for cell specificity) | ✓                        |                                                     | ✓ (sparse expression can allow single cell tracing) | widely compatible                                                                                                                                                                                                                                                                                                                                                                              | <ul style="list-style-type: none"> <li>Transsynaptic labeling highly efficient</li> <li>Can be used to identify IDEs</li> </ul>                                                      | <ul style="list-style-type: none"> <li>Transsynaptic labeling is not highly efficient</li> <li>Not strictly anterograde</li> </ul>                                                          | Gerfen and Sawchenko, 1984 |
|                 | CtB                                                                             | Retrograde (axonal uptake)                                                            |                                                                            |                       |                                                                              |                          |                                                     |                                                     |                                                                                                                                                                                                                                                                                                                                                                                                | <ul style="list-style-type: none"> <li>Retrograde labeling possible</li> <li>Cell type specificity possible</li> <li>Can be used to identify ODEs</li> </ul>                         | <ul style="list-style-type: none"> <li>Not strictly retrograde</li> </ul>                                                                                                                   | Conte et al., 2009         |
|                 | TTC                                                                             | Retrograde (transsynaptic)                                                            |                                                                            |                       |                                                                              |                          |                                                     |                                                     |                                                                                                                                                                                                                                                                                                                                                                                                | <ul style="list-style-type: none"> <li>Transsynaptic labeling highly efficient</li> <li>Can be used to identify IDE or ODEs</li> </ul>                                               | <ul style="list-style-type: none"> <li>Transsynaptic labeling is not highly efficient</li> <li>Not strictly retrograde</li> </ul>                                                           | Kissa et al., 2002         |
| AAV             | Anterograde (axon tracing)<br>Can also be used to express transsynaptic markers | XFP or cre expressed by virus                                                         | ✓                                                                          | ✓                     | ✓ (if encoded virus is engineered to express a transsynaptic tracer protein) |                          | ✓ (sparse expression can allow single cell tracing) | mammals                                             | <ul style="list-style-type: none"> <li>Versatile, relatively non-toxic package for delivery of numerous tracing components</li> <li>Allows cell type specificity using specific promoters or when combined with recombinase expression strategies</li> <li>Can be used to identify IDEs (e.g. when combined with transsynaptic tracer proteins) and/or ODEs (e.g. via axon tracing)</li> </ul> | <ul style="list-style-type: none"> <li>Packaging size limited to ~5 kB</li> <li>Inconsistent reports of retrograde transport, may require batch-by-batch characterization</li> </ul> | Betley and Sternson, 2011 (review)<br>Wang et al., 2014 (comparison with BDA)<br>Oh et al., 2014 (Allen Mouse Connectivity Atlas)                                                           |                            |

Table S1. Tools for Neural Circuit Mapping 3 of 5

| Method              | Connectivity Information/<br>Tracing Directionality                                                 | Mechanism/<br>Marker          | Properties Checklist   |                       |                |                                    |                        |                       | Species Compatibility                            | Major Applications/<br>Advantages                                                                                                                                                                                                                                           | Major Caveats                                                                                                                                                                                                                          | References                                                                                                                                                                                      |
|---------------------|-----------------------------------------------------------------------------------------------------|-------------------------------|------------------------|-----------------------|----------------|------------------------------------|------------------------|-----------------------|--------------------------------------------------|-----------------------------------------------------------------------------------------------------------------------------------------------------------------------------------------------------------------------------------------------------------------------------|----------------------------------------------------------------------------------------------------------------------------------------------------------------------------------------------------------------------------------------|-------------------------------------------------------------------------------------------------------------------------------------------------------------------------------------------------|
|                     |                                                                                                     |                               | Long-range Connections | Cell-type specificity | Trans-synaptic | Mono-synaptic Restricted           | Single Cell Resolution | Synapse Visualization |                                                  |                                                                                                                                                                                                                                                                             |                                                                                                                                                                                                                                        |                                                                                                                                                                                                 |
| alpha-herpesviruses | HSV-1                                                                                               |                               |                        |                       |                |                                    |                        |                       | mammals, some evidence for fish (see References) | <ul style="list-style-type: none"> <li>Efficient retrograde viral tracer</li> <li>Transsynaptic labeling</li> <li>Can be used to identify IDEs or ODEs (as in Fenno et al., 2014)</li> </ul>                                                                                | <ul style="list-style-type: none"> <li>Toxicity</li> <li>Careful characterization required to assure that spread is restricted to synaptically connected cells</li> <li>Only particular strains are specifically retrograde</li> </ul> | Ugolini et al., 1987<br>Zemanick et al., 1991 (strain specificity)<br>LaVail et al., 1997 (strain specificity)<br>Fenno et al., 2014 (cell-type specific approaches)<br>Zou et al., 2014 (fish) |
|                     | PRV Bartha                                                                                          | XFP or cre expressed by virus | ✓                      | ✓                     | ✓              | ✓ (Ba2000 variant; see References) |                        |                       | non-primate mammals                              | <ul style="list-style-type: none"> <li>Efficient retrograde viral tracer</li> <li>Transsynaptic labeling</li> <li>Monosynaptic restriction may be possible</li> <li>Less toxic than other HSV strains</li> <li>Can be used to identify IDEs or ODEs</li> </ul>              | <ul style="list-style-type: none"> <li>Toxicity</li> </ul>                                                                                                                                                                             | Enquist, 2002<br>Ekstrand et al., 2008<br>De Falco et al., 2001 (Ba2001 cell-type specific strain)<br>Callaway, 2008 (see comment on Ba2000 for monosynaptic restriction)                       |
|                     | H129 strain                                                                                         | Anterograde (transsynaptic)   |                        |                       |                |                                    |                        |                       | mammals                                          | <ul style="list-style-type: none"> <li>Anterograde viral tracer</li> <li>Transsynaptic labeling</li> <li>Can be used to identify IDEs</li> </ul>                                                                                                                            | <ul style="list-style-type: none"> <li>Toxicity</li> </ul>                                                                                                                                                                             | Sun et al., 1996<br>Lo and Anderson, 2011 (cre-dependent cell-type specificity)                                                                                                                 |
| VSV                 | Anterograde (transsynaptic) or retrograde (transsynaptic): Directionality is glycoprotein dependent | XFP label expressed by virus  | ✓                      | ✓                     | ✓              | ✓                                  |                        |                       | widely compatible                                | <ul style="list-style-type: none"> <li>Anterograde viral tracer</li> <li>Transsynaptic labeling</li> <li>Can be used to identify IDEs</li> <li>Can be retracted to monosynaptic labeling using G deletion</li> <li>Cell type specificity using EnvA pseudotyping</li> </ul> | <ul style="list-style-type: none"> <li>Toxicity</li> <li>Poorly understood batch variability, requires careful batch-by-batch characterization (see Correction to Beier et al., 2011)</li> </ul>                                       | Beier et al., 2011<br>Mundell et al., 2015                                                                                                                                                      |
| CAV                 | Retrograde (axon transducing)                                                                       | cre or GFP expressed by virus | ✓                      | ✓                     |                |                                    |                        |                       | mammals                                          | <ul style="list-style-type: none"> <li>Relatively non-toxic retrograde viral tracer. The lack of toxicity makes this virus particularly appealing for examining functional circuit elements in vivo.</li> <li>Can be used to identify ODEs</li> </ul>                       | <ul style="list-style-type: none"> <li>Not transsynaptic</li> </ul>                                                                                                                                                                    | Soudais et al., 2001<br>Junyent and Kremer, 2015<br>also see TRIO references                                                                                                                    |

Table S1. Tools for Neural Circuit Mapping 4 of 5

| Method                     | Connectivity Information/<br>Tracing Directionality                                                                       | Mechanism/<br>Marker                                                                                                          | Properties Checklist                                                  |                                         |                |                                        |                        |                                                                            | Species Compatibility                                                | Major Applications/<br>Advantages                                                                                                                                                                                                                                                                                | Major Caveats                                                                                                                                        | References                                                                                                                                      |
|----------------------------|---------------------------------------------------------------------------------------------------------------------------|-------------------------------------------------------------------------------------------------------------------------------|-----------------------------------------------------------------------|-----------------------------------------|----------------|----------------------------------------|------------------------|----------------------------------------------------------------------------|----------------------------------------------------------------------|------------------------------------------------------------------------------------------------------------------------------------------------------------------------------------------------------------------------------------------------------------------------------------------------------------------|------------------------------------------------------------------------------------------------------------------------------------------------------|-------------------------------------------------------------------------------------------------------------------------------------------------|
|                            |                                                                                                                           |                                                                                                                               | Long-range Connections                                                | Cell-type specificity                   | Trans-synaptic | Mono-synaptic Restricted               | Single Cell Resolution | Synapse Visualization                                                      |                                                                      |                                                                                                                                                                                                                                                                                                                  |                                                                                                                                                      |                                                                                                                                                 |
| <b>Rabies</b>              | Retrograde (transsynaptic and axon transducing)                                                                           | XFP label expressed by virus                                                                                                  | ✓                                                                     | ✓ (EnvA variants; see References)       | ✓              | ✓ (G-deleted variants; see References) |                        |                                                                            | mammals                                                              | <ul style="list-style-type: none"> <li>• Specific, efficient retrograde viral tracer</li> <li>• Transsynaptic labeling</li> <li>• Can be used to identify IDEs or ODEs</li> <li>• Can be retracted to monosynaptic labeling using G deletion</li> <li>• Cell type specificity using EnvA pseudotyping</li> </ul> | <ul style="list-style-type: none"> <li>• Toxicity</li> <li>• Down-regulation of host gene expression</li> </ul>                                      | Wickersham et al., 2007<br>Callaway and Luo, 2015 (review)                                                                                      |
| <b>TRIO/cTRIO</b>          | Retrograde (axon transducing; CAV) and Retrograde (transsynaptic; rabies): Allows three steps of a circuit to be examined | XFP label expressed by virus                                                                                                  | ✓                                                                     | ✓ (cTRIO variant; see References)       | ✓              | ✓                                      |                        |                                                                            | demonstrated in mice, likely compatible with other mammalian systems | <ul style="list-style-type: none"> <li>• Same advantages of rabies (above)</li> <li>• Specification of inputs based on output target, allowing visualization of the relationship between IDEs and ODEs (IODEs)</li> </ul>                                                                                        | <ul style="list-style-type: none"> <li>• Toxicity</li> <li>• Down-regulation of host gene expression</li> </ul>                                      | Schwarz et al., 2015<br>Beier et al., 2015<br>Lerner et al., 2015                                                                               |
| <b>GRASP/mGRASP</b>        | Synaptic partners                                                                                                         | Split GFP reconstituted at synapses                                                                                           | ✓                                                                     | ✓                                       |                |                                        |                        |                                                                            | currently optimized for worms (GRASP) and mammals (mGRASP)           | <ul style="list-style-type: none"> <li>• Synapse visualization from defined partners</li> <li>• Can be used to further characterize the fine structure of IDEs or ODEs</li> </ul>                                                                                                                                | <ul style="list-style-type: none"> <li>• Possible bias for false positives in synapse detection</li> </ul>                                           | Feinberg et al., 2008<br>Kim et al., 2011                                                                                                       |
| <b>SynView</b>             | Synaptic partners                                                                                                         | Split GFP reconstituted at synapses                                                                                           | ✓                                                                     | ✓                                       |                |                                        |                        |                                                                            | currently optimized for mammals                                      | <ul style="list-style-type: none"> <li>• Synapse visualization from defined partners</li> <li>• Can be used to further characterize the fine structure of IDEs or ODEs</li> </ul>                                                                                                                                | <ul style="list-style-type: none"> <li>• Currently limited to examining synaptic contacts initiated by specific adhesion molecules</li> </ul>        | Tsetsenis et al., 2014                                                                                                                          |
| <b>Brainbow</b>            | Anterograde (axon tracing)                                                                                                | Stochastic expression of 3 XFPs                                                                                               | ✓                                                                     | ✓                                       |                |                                        |                        | ✓                                                                          | widely compatible - currently adapted for worms, flies, fish, mice   | <ul style="list-style-type: none"> <li>• Combination of single cell resolution and dense labeling is possible (up to 100s of colors)</li> <li>• Can be used to identify ODEs</li> </ul>                                                                                                                          | <ul style="list-style-type: none"> <li>• Imaging is a major challenge (chromatic aberrations, bleaching, etc can make analysis difficult)</li> </ul> | Livet et al., 2007<br>Pan et al., 2011 (fish)<br>Hampel et al., 2011 (flies)<br>Hadjicriconomou et al., 2011 (flies)<br>Cai et al., 2013        |
| <b>Electron Microscopy</b> | Ultrastructural cell morphology                                                                                           | HRP/Diaminobenzidine (DAB) reaction, electron-dense membrane contrast agents, and/or heavy metal-conjugated antibody labeling | ✓ (can be combined with long-range techniques e.g. FluoroGold, GESEM) | ✓ (limited multifeature immunostaining) |                |                                        |                        | ✓ (synapses can be identified by morphology and/or limited immunostaining) | widely compatible                                                    | <ul style="list-style-type: none"> <li>• The most complete picture of neuronal morphology and circuit structure is obtained</li> <li>• Can be used to identify or further characterize the fine structure of IDEs or ODEs</li> </ul>                                                                             | <ul style="list-style-type: none"> <li>• Extensive time and cost, even for imaging very small tissue volumes</li> </ul>                              | Jurrus et al., 2009<br>Kleinfeld et al., 2011<br>Ward et al., 1975<br>Bock et al., 2011<br>Briggman et al., 2011<br>Atasoy et al., 2014 (GESEM) |

Table S1. Tools for Neural Circuit Mapping 5 of 5

| Method                                              | Connectivity Information/<br>Tracing<br>Directionality | Mechanism/<br>Marker                                                      | Properties Checklist                           |                          |                    |                                 |                           |                          | Species<br>Compatibility | Major<br>Applications/<br>Advantages | Major Caveats                                                                                                                                                            | References                                                                                                                                                                   |                                                                                                                                                         |
|-----------------------------------------------------|--------------------------------------------------------|---------------------------------------------------------------------------|------------------------------------------------|--------------------------|--------------------|---------------------------------|---------------------------|--------------------------|--------------------------|--------------------------------------|--------------------------------------------------------------------------------------------------------------------------------------------------------------------------|------------------------------------------------------------------------------------------------------------------------------------------------------------------------------|---------------------------------------------------------------------------------------------------------------------------------------------------------|
|                                                     |                                                        |                                                                           | Long-range<br>Connections                      | Cell-type<br>specificity | Trans-<br>synaptic | Mono-<br>synaptic<br>Restricted | Single Cell<br>Resolution | Synapse<br>Visualization |                          |                                      |                                                                                                                                                                          |                                                                                                                                                                              |                                                                                                                                                         |
| <b>Functional Magnetic Resonance Imaging (fMRI)</b> | Functional connectivity                                | BOLD signal (correlation)                                                 | (inference by correlation, need not be direct) |                          |                    |                                 |                           |                          |                          | Human, non-human primate, rodent     | <ul style="list-style-type: none"> <li>• Whole brain functional connectivity visible in a live subject</li> <li>• Non-invasive, compatible with human studies</li> </ul> | <ul style="list-style-type: none"> <li>• Indirect (non-anatomical) measure of connectivity precludes IODE identification</li> <li>• No cell type specificity</li> </ul>      | Friston, 2011 (functional and effective connectivity review)<br>Poldrack and Farah, 2015 (recent review of human imaging methods, with a focus on fMRI) |
| <b>Diffusion Weighted Imaging (DWI)</b>             | White matter tract structure                           | Visualization of water diffusion preferentially along white matter tracts | (inference by diffusion, need not be direct)   |                          |                    |                                 |                           |                          |                          | Human, non-human primate, rodent     | <ul style="list-style-type: none"> <li>• Whole brain structural pathways visible in a live subject</li> <li>• Non-invasive, compatible with human studies</li> </ul>     | <ul style="list-style-type: none"> <li>• Resolution limited to large white matter tracts</li> <li>• No functional information</li> <li>• No cell type specificity</li> </ul> | Le Bihan and Johansen-Berg, 2012                                                                                                                        |

## Table S2. Tissue Transparency Methods for Intact Analyses

Selected techniques currently available for achieving intact tissue transparency and covering a broad range of capabilities are summarized. In light of the focus of this primer, methods with demonstrated capacity to clear intact adult mouse brains are listed. We divided these published whole-brain transparency techniques into three main categories: hydrogel-based methods (e.g., CLARITY), organic methods (e.g., iDISCO/3DISCO), and aqueous non-gel methods (e.g., Scale, CUBIC). Under each general heading, we then list extensions, variations, and new directions, as well as published demonstrations of use and papers reporting biological discoveries made using these methods. N.D., not determined in the original literature as of this writing.

| Tissue Transparency Method                                 | Initial method references                  | Clearing mechanism                                                                                                                                                                                               | Optical quality (intact adult mouse brain) | Reversibility                                                    | Labeling                      |                              |              |           | Extensions/ variations and new directions                                                                                                                                                                                                           | Biological demonstrations and discoveries in the brain (beyond the initial papers)                                                                                                                                | Biological demonstrations and discoveries in non-brain tissues (beyond the initial papers)                                                                                                                                                                                                                                                                                                                                           |
|------------------------------------------------------------|--------------------------------------------|------------------------------------------------------------------------------------------------------------------------------------------------------------------------------------------------------------------|--------------------------------------------|------------------------------------------------------------------|-------------------------------|------------------------------|--------------|-----------|-----------------------------------------------------------------------------------------------------------------------------------------------------------------------------------------------------------------------------------------------------|-------------------------------------------------------------------------------------------------------------------------------------------------------------------------------------------------------------------|--------------------------------------------------------------------------------------------------------------------------------------------------------------------------------------------------------------------------------------------------------------------------------------------------------------------------------------------------------------------------------------------------------------------------------------|
|                                                            |                                            |                                                                                                                                                                                                                  |                                            |                                                                  | Protein (native fluorescence) | Protein (immunostaining)     | Nucleic acid | Lipid dye |                                                                                                                                                                                                                                                     |                                                                                                                                                                                                                   |                                                                                                                                                                                                                                                                                                                                                                                                                                      |
| <b>CLARITY and hydrogel variations</b>                     | Chung, 2013                                | Formation of a hydrophilic tissue-polymer composite, followed by aqueous solvent-based disruption and removal of unbound components such as lipids by diffusive, mechanical, thermal, electrical, or other means | Fully transparent                          | Irreversible gel transformation, reversible labeling and imaging | Yes                           | Yes                          | Yes          | No        | Passive CLARITY (Tomer 2014, Zheng 2015), PACT/PARS (Yang, 2014), COLM (Tomer, 2014), ExM (Chen, 2015a), Stochastic electrotransport (Kim, 2015), SWITCH (Murray, 2015), ACT-PRESTO (Lee, 2016), SPED (Tomer, 2015), EDC-CLARITY (Sylwestrak, 2016) | <b>Rodent brain:</b> Hsiang, 2014; Spence, 2014; Lerner, 2015; Menegas, 2015; Adhikari, 2015; Plummer, 2015; Zhang, 2014; Tomer, 2015; Unal, 2015; Sylwestrak, 2016<br><b>Human brain:</b> Ando, 2014; Liu, 2015a | <b>Rodent:</b> Lung (Joshi, 2015; Saboor, 2015), Liver (Font-Burgada, 2015), Whole animals/embryo/multiple organs (Epp, 2015; Yang, 2014), Spinal cord (Zhang, 2014)<br><b>Plant:</b> Palmer 2015                                                                                                                                                                                                                                    |
| <b>3DISCO and hydrophobic (organic solvent) variations</b> | Erturk, 2012                               | Organic solvent-based lipid removal by dehydration/rehydration and bleaching on native tissue                                                                                                                    | Fully transparent                          | Irreversible                                                     | Rapid quenching               | Yes (especially with iDISCO) | N.D.         | No        | iDISCO (Reiner, 2014)                                                                                                                                                                                                                               | <b>Rodent brain:</b> Weber, 2014; Zapiec, 2015; Garofalo, 2015<br><b>Human brain:</b> Theofilas, 2014                                                                                                             | <b>Rodent:</b> Thymus (Ziętara et al, 2015), Skin (Maksimovic, 2014; Oshimori, 2015), Islets (Juang, 2015), Bone marrow (Acar, 2015), Lymph node (Liu, 2015c), Spinal cord (Papa, 2016; Soderblom 2015; Zhu, 2015)<br><b>Human:</b> Lung (Hoffmann, 2015)                                                                                                                                                                            |
| <b>Aqueous non-gel variations</b>                          | Hama, 2011 (Scale)<br>Susaki, 2014 (CUBIC) | Chemical cocktail-based lipid removal and decolorization on native tissue (also compatible with CLARITY/hydrogel variants)                                                                                       | Mostly transparent                         | Irreversible                                                     | Yes                           | Yes                          | N.D.         | No        | Whole body CUBIC (Tainaka, 2014); Scales (Hama, 2015)                                                                                                                                                                                               | <b>Rodent brain:</b> Singh 2015; Asai, 2015; Ozkan, 2015                                                                                                                                                          | <b>Rodent:</b> Lung (Noguchi, 2015; Peng, 2015; Jain, 2015), Heart (Machon, 2015; Chabab, 2016), Spinal cord (Hinckley, 2015), GI system (Higashiyama, 2016; Liu, 2015b), lymph node (Jafarnejad, 2015; Moalli, 2015), Whole animals/embryo (Huang, 2015; Roccaro, 2015; Hirashima, 2015; Dorr, 2015; Hartman, 2015)<br><b>Bird:</b> Botelho, 2015<br><b>Xenopus:</b> Tsujioka, 2015<br><b>Human:</b> Intestine (Clairembault, 2015) |

**Table S3. Activity Readouts for Functional Neural Circuit Analysis**

Selected techniques currently available for achieving brain activity readouts and covering a broad range of capabilities are summarized. Three main categories are listed: electrophysiological, optical, and immediate early gene (IEG)-based. We also list fMRI as an important method for achieving whole-brain activity readouts, especially given compatibility with small mammals and optogenetics. For recent discussion of other activity readouts available for use in humans, beyond the scope of this review, see Poldrack and Farah (2015).

|                                     | Method                                      | Species Compatibility            | Compatibility with Awake Behavior          | Major Applications/ Advantages                                                                                                                                                                                                                                                                                                | Major Caveats                                                                                                                                                                                                               | References                                                                                                                                                                                                                                                                     |
|-------------------------------------|---------------------------------------------|----------------------------------|--------------------------------------------|-------------------------------------------------------------------------------------------------------------------------------------------------------------------------------------------------------------------------------------------------------------------------------------------------------------------------------|-----------------------------------------------------------------------------------------------------------------------------------------------------------------------------------------------------------------------------|--------------------------------------------------------------------------------------------------------------------------------------------------------------------------------------------------------------------------------------------------------------------------------|
| Electrophysiological Readouts       | Whole-cell in slice                         | primarily mice, rats             | not compatible                             | <ul style="list-style-type: none"> <li>• Experimenter control over ion concentrations</li> <li>• Easily controlled pharmacological manipulation</li> <li>• Intracellular access</li> <li>• Single cell resolution</li> </ul>                                                                                                  | <ul style="list-style-type: none"> <li>• No behavioral context</li> <li>• Full circuits and circuit dynamics may not be preserved in slice</li> </ul>                                                                       | Walz et al., 2002 (Neuromethods textbook)                                                                                                                                                                                                                                      |
|                                     | Whole-cell in vivo                          | widely compatible                | compatible                                 | <ul style="list-style-type: none"> <li>• Intracellular access in an intact circuit</li> <li>• Intracellular access during behavior</li> <li>• Single cell resolution</li> </ul>                                                                                                                                               | <ul style="list-style-type: none"> <li>• Low throughput, technically demanding approach</li> <li>• Not currently compatible with behavior over days</li> </ul>                                                              | Lee et al., 2006<br>Kitamura et al., 2008 ("shadow patching" of unlabeled cells)<br>Kodandaramaiah et al., 2012 (automation)<br>Munoz et al., 2014 (channelrhodopsin-assisted cell targeting)                                                                                  |
|                                     | Extracellular in vivo                       | widely compatible                | compatible                                 | <ul style="list-style-type: none"> <li>• Well-established method for monitoring neuronal activity during free behavior</li> <li>• Excellent temporal resolution</li> <li>• Multi- or single-unit recordings</li> <li>• Action potential collision tests can be used to establish projection targets</li> </ul>                | <ul style="list-style-type: none"> <li>• Cell type identification (e.g. using juxtacellular labeling) is low throughput</li> <li>• Biased towards isolating active cells</li> </ul>                                         | Chorev et al., 2009 (review)<br>Lipski et al., 1981 (collision testing)                                                                                                                                                                                                        |
|                                     | Extracellular in vivo with optotagging      | mice                             | compatible                                 | <ul style="list-style-type: none"> <li>• Combines a well-established method for monitoring neuronal activity with a potentially higher throughput method of cell type identification</li> </ul>                                                                                                                               | <ul style="list-style-type: none"> <li>• Although cell type identification is higher throughput than juxtacellular labeling, it can be difficult to definitively ID cells. Arbitrary cutoffs are often employed.</li> </ul> | Lima et al., 2009<br>Cardin et al., 2010                                                                                                                                                                                                                                       |
| Optical Readouts                    | Voltage imaging                             | flies, mice                      | not yet tested                             | <ul style="list-style-type: none"> <li>• An optical readout of neuronal activity that permits single cell resolution from many, even densely packed cells</li> <li>• Good temporal resolution</li> <li>• Access to subthreshold membrane voltage dynamics</li> <li>• Compatible with in vivo or slice preparations</li> </ul> | <ul style="list-style-type: none"> <li>• Sensors are still largely under development</li> </ul>                                                                                                                             | Gong et al., 2015 (recent indicator improvement)<br>St.-Pierre et al., 2014 (recent indicator improvement)<br>Knopfel, 2012 (indicator review)<br>Hamel et al., 2015 (recent brain imaging review)                                                                             |
|                                     | Calcium imaging                             | widely compatible                | compatible                                 | <ul style="list-style-type: none"> <li>• An optical readout of neuronal activity that permits single cell resolution from many, even densely packed cells</li> <li>• Compatible with in vivo or slice preparations</li> <li>• High signal-to-noise sensors available in green and red</li> </ul>                              | <ul style="list-style-type: none"> <li>• No access to subthreshold membrane voltage dynamics</li> <li>• Relatively slow kinetics compared to electrophysiology</li> </ul>                                                   | Hamel et al., 2015 (recent brain imaging review)                                                                                                                                                                                                                               |
|                                     | Fiber photometry                            | mice, rats                       | compatible                                 | <ul style="list-style-type: none"> <li>• An optical readout of neuronal activity from a genetically defined population of neurons</li> <li>• An easy-to-implement technique that is highly compatible with freely moving behavior</li> <li>• Compatible with any optical indicator</li> </ul>                                 | <ul style="list-style-type: none"> <li>• Lack of single cell resolution</li> </ul>                                                                                                                                          | Lutcke et al., 2010<br>Schulz et al., 2012<br>Cui et al., 2013<br>Gunaydin et al., 2014 (deep brain axonal signals relevant to ODEs)<br>Lerner et al., 2015 (isosbestic control excitation wavelength)<br>Guo et al., 2015<br>Kim et al., 2016<br>Zalocusky et al., 2016 (rat) |
| Immediate Early Gene (IEG) Readouts | IEG histology                               | widely compatible                | compatible                                 | <ul style="list-style-type: none"> <li>• Allows a broad readout of recently activated neurons</li> </ul>                                                                                                                                                                                                                      | <ul style="list-style-type: none"> <li>• Poor temporal resolution (hours)</li> <li>• Post-mortem fixed-tissue readout</li> </ul>                                                                                            | Guzowski et al., 2005 (review)                                                                                                                                                                                                                                                 |
|                                     | IEG transgenic reporters (Fos-GFP, Arc-GFP) | mice                             | compatible                                 | <ul style="list-style-type: none"> <li>• Allows a broad readout of recently activated neurons</li> <li>• Compatible with whole brain measurement, in vivo imaging, slice electrophysiology</li> </ul>                                                                                                                         | <ul style="list-style-type: none"> <li>• Poor temporal resolution (hours)</li> </ul>                                                                                                                                        | Barth et al., 2007 (review)                                                                                                                                                                                                                                                    |
|                                     | TRAP (FosTRAP, ArcTRAP)                     | mice                             | compatible                                 | <ul style="list-style-type: none"> <li>• Allows a broad readout of recently activated neurons</li> <li>• Compatible with whole brain measurement, in vivo imaging, slice electrophysiology</li> <li>• Readout occurs during a chemically-defined window</li> </ul>                                                            | <ul style="list-style-type: none"> <li>• Poor temporal resolution (hours)</li> </ul>                                                                                                                                        | Guenther et al., 2013                                                                                                                                                                                                                                                          |
|                                     | fMRI                                        | Human, non-human primate, rodent | compatible with awake, but still, subjects | <ul style="list-style-type: none"> <li>• Whole brain readout visible in a live subject</li> <li>• Non-invasive, compatible with human studies</li> <li>• In non-human studies, can be combined with optogenetic manipulation (ofMRI)</li> </ul>                                                                               | <ul style="list-style-type: none"> <li>• Poor temporal resolution (seconds)</li> <li>• Lack of single cell resolution</li> </ul>                                                                                            | Poldrack and Farah, 2015 (review)<br>Lee et al., 2010 (ofMRI)                                                                                                                                                                                                                  |



## Supplemental References

- Acar, M., Kocherlakota, K.S., Murphy, M.M., Peyer, J.G., Oguro, H., Inra, C.N., Jaiyeola, C., Zhao, Z., Luby-Phelps, K., and Morrison, S.J. (2015). Deep imaging of bone marrow shows non-dividing stem cells are mainly perisinusoidal. *Nature* 526, 126–130.
- Ando, K., Laborde, Q., Lazar, A., Godefroy, D., Youssef, I., Amar, M., Pooler, A., Potier, M.-C., Delatour, B., and Duyckaerts, C. (2014). Inside Alzheimer brain with CLARITY: senile plaques, neurofibrillary tangles and axons in 3-D. *Acta Neuropathol.* 128, 457–459.
- Asai, H., Ikezu, S., Tsunoda, S., Medalla, M., Luebke, J., Haydar, T., Wolozin, B., Butovsky, O., Kügler, S., and Ikezu, T. (2015). Depletion of microglia and inhibition of exosome synthesis halt tau propagation. *Nat. Neurosci.* 18, 1584–1593.
- Barth, A.L. (2007). Visualizing circuits and systems using transgenic reporters of neural activity. *Curr. Opin. Neurobiol.* 17, 567–571.
- Beier, K.T., Saunders, A., Oldenburg, I.A., Miyamichi, K., Akhtar, N., Luo, L., Whelan, S.P.J., Sabatini, B., and Cepko, C.L. (2011). Anterograde or retrograde transsynaptic labeling of CNS neurons with vesicular stomatitis virus vectors. *Proc. Natl. Acad. Sci. USA* 108, 15414–15419.
- Betley, J.N., and Sternson, S.M. (2011). Adeno-associated viral vectors for mapping, monitoring, and manipulating neural circuits. *Hum. Gene Ther.* 22, 669–677.
- Bock, D.D., Lee, W.-C.A., Kerlin, A.M., Andermann, M.L., Hood, G., Wetzel, A.W., Yurgenson, S., Soucy, E.R., Kim, H.S., and Reid, R.C. (2011). Network anatomy and in vivo physiology of visual cortical neurons. *Nature* 471, 177–182.
- Briggman, K.L., Helmstaedter, M., and Denk, W. (2011). Wiring specificity in the direction-selectivity circuit of the retina. *Nature* 471, 183–188.
- Callaway, E.M. (2008). Transneuronal circuit tracing with neurotropic viruses. *Curr. Opin. Neurobiol.* 18, 617–623.
- Callaway, E.M., and Luo, L. (2015). Monosynaptic Circuit Tracing with Glycoprotein-Deleted Rabies Viruses. *J. Neurosci.* 35, 8979–8985.
- Cardin, J.A., Carlén, M., Meletis, K., Knoblich, U., Zhang, F., Deisseroth, K., Tsai, L.-H., and Moore, C.I. (2010). Targeted optogenetic stimulation and recording of neurons in vivo using cell-type-specific expression of Channelrhodopsin-2. *Nat. Protoc.* 5, 247–254.
- Chabab, S., Lescroart, F., Rulands, S., Mathiah, N., Simons, B.D., and Blanpain, C. (2016). Uncovering the Number and Clonal Dynamics of Mesp1 Progenitors during Heart Morphogenesis. *Cell Rep.* 14, 1–10.
- Chen, F., Tillberg, P.W., and Boyden, E.S. (2015). Expansion microscopy. *Science* 347, 543–548.
- Chorev, E., Epsztein, J., Houweling, A.R., Lee, A.K., and Brecht, M. (2009). Electrophysiological recordings from behaving animals--going beyond spikes. *Curr. Opin. Neurobiol.* 19, 513–519.

Clairembault, T., Leclair-Visonneau, L., Coron, E., Bourreille, A., Le Dily, S., Vavasseur, F., Heymann, M.-F., Neunlist, M., and Derkinderen, P. (2015). Structural alterations of the intestinal epithelial barrier in Parkinson's disease. *Acta Neuropathol. Commun.* 3, 12.

DeFalco, J., Tomishima, M., Liu, H., Zhao, C., Cai, X., Marth, J.D., Enquist, L., and Friedman, J.M. (2001). Virus-assisted mapping of neural inputs to a feeding center in the hypothalamus. *Science* 291, 2608–2613.

Dorr, K.M., Amin, N.M., Kuchenbrod, L.M., Labiner, H., Charpentier, M.S., Pevny, L.H., Wessels, A., and Conlon, F.L. (2015). *Cas21* is required for cardiomyocyte G1-to-S phase progression during mammalian cardiac development. *Development* 142, 2037–2047.

Ekstrand, M.I., Enquist, L.W., and Pomeranz, L.E. (2008). The alpha-herpesviruses: molecular pathfinders in nervous system circuits. *Trends Mol. Med.* 14, 134–140.

Enquist, L.W. (2002). Exploiting circuit-specific spread of pseudorabies virus in the central nervous system: insights to pathogenesis and circuit tracers. *J. Infect. Dis.* 186 (Suppl 2), S209–S214.

Epp, J.R., Niibori, Y., Liz Hsiang, H.L., Mercaldo, V., Deisseroth, K., Josselyn, S.A., and Frankland, P.W. (2015). Optimization of CLARITY for Clearing Whole-Brain and Other Intact Organs(1,2,3). *eNeuro* 2, pii: ENEURO.0087-15.2015.

Font-Burgada, J., Shalpour, S., Ramaswamy, S., Hsueh, B., Rossell, D., Umemura, A., Taniguchi, K., Nakagawa, H., Valasek, M.A., Ye, L., et al. (2015). Hybrid Periportal Hepatocytes Regenerate the Injured Liver without Giving Rise to Cancer. *Cell* 162, 766–779.

Botelho, J.F., Smith-Paredes, D., Soto-Acuña, S., Mpodozis, J., Palma, V., and Vargas, A.O. (2015). Skeletal plasticity in response to embryonic muscular activity underlies the development and evolution of the perching digit of birds. *Sci. Rep.* 5, 9840.

Friston, K.J. (2011). Functional and effective connectivity: a review. *Brain Connect.* 1, 13–36.

Garofalo, S., D'Alessandro, G., Chece, G., Brau, F., Maggi, L., Rosa, A., Porzia, A., Mainiero, F., Esposito, V., Lauro, C., et al. (2015). Enriched environment reduces glioma growth through immune and non-immune mechanisms in mice. *Nat. Commun.* 6, 6623.

Guo, Q., Zhou, J., Feng, Q., Lin, R., Gong, H., Luo, Q., Zeng, S., Luo, M., and Fu, L. (2015). Multi-channel fiber photometry for population neuronal activity recording. *Biomed. Opt. Express* 6, 3919–3931.

Guzowski, J.F., Timlin, J.A., Roysam, B., McNaughton, B.L., Worley, P.F., and Barnes, C.A. (2005). Mapping behaviorally relevant neural circuits with immediate-early gene expression. *Curr. Opin. Neurobiol.* 15, 599–606.

Hama, H., Hioki, H., Namiki, K., Hoshida, T., Kurokawa, H., Ishidate, F., Kaneko, T., Akagi, T., Saito, T., Saïdo, T., and Miyawaki, A. (2015). ScaleS: an optical clearing palette for biological imaging. *Nat. Neurosci.* 18, 1518–1529.

- Hamel, E.J.O., Grewe, B.F., Parker, J.G., and Schnitzer, M.J. (2015). Cellular level brain imaging in behaving mammals: an engineering approach. *Neuron* 86, 140–159.
- Hartman, B.H., Durruthy-Durruthy, R., Laske, R.D., Losorelli, S., and Heller, S. (2015). Identification and characterization of mouse otic sensory lineage genes. *Front. Cell. Neurosci.* 9, 79.
- Higashiyama, H., Sumitomo, H., Ozawa, A., Igarashi, H., Tsunekawa, N., Kurohmaru, M., and Kanai, Y. (2016). Anatomy of the Murine Hepatobiliary System: A Whole-Organ-Level Analysis Using a Transparency Method. *Anat. Rec. (Hoboken)* 299, 161–172.
- Hinckley, C.A., Alaynick, W.A., Gallarda, B.W., Hayashi, M., Hilde, K.L., Driscoll, S.P., Dekker, J.D., Tucker, H.O., Sharpee, T.O., and Pfaff, S.L. (2015). Spinal Locomotor Circuits Develop Using Hierarchical Rules Based on Motorneuron Position and Identity. *Neuron* 87, 1008–1021.
- Hirashima, T., and Adachi, T. (2015). Procedures for the quantification of whole-tissue immunofluorescence images obtained at single-cell resolution during murine tubular organ development. *PLoS ONE* 10, e0135343.
- Hoffmann, J., Marsh, L.M., Pieper, M., Stacher, E., Ghanim, B., Kovacs, G., König, P., Wilkens, H., Haitchi, H.M., Hoefler, G., et al. (2015). Compartment-specific expression of collagens and their processing enzymes in intrapulmonary arteries of IPAH patients. *Am. J. Physiol. Lung Cell. Mol. Physiol.* 308, L1002–L1013.
- Hsiang, H.L., Epp, J.R., van den Oever, M.C., Yan, C., Rashid, A.J., Insel, N., Ye, L., Niibori, Y., Deisseroth, K., Frankland, P.W., and Josselyn, S.A. (2014). Manipulating a “cocaine engram” in mice. *J. Neurosci.* 34, 14115–14127.
- Huang, A.H., Riordan, T.J., Pryce, B., Weibel, J.L., Watson, S.S., Long, F., Lefebvre, V., Harfe, B.D., Stadler, H.S., Akiyama, H., et al. (2015). Musculoskeletal integration at the wrist underlies the modular development of limb tendons. *Development* 142, 2431–2441.
- Jafarnejad, M., Woodruff, M.C., Zawieja, D.C., Carroll, M.C., and Moore, J.E., Jr. (2015). Modeling Lymph Flow and Fluid Exchange with Blood Vessels in Lymph Nodes. *Lymphat. Res. Biol.* 13, 234–247.
- Jain, R., Barkauskas, C.E., Takeda, N., Bowie, E.J., Aghajanian, H., Wang, Q., Padmanabhan, A., Manderfield, L.J., Gupta, M., Li, D., et al. (2015). Plasticity of Hopx(+) type I alveolar cells to regenerate type II cells in the lung. *Nat. Commun.* 6, 6727.
- Joshi, N.S., Akama-Garren, E.H., Lu, Y., Lee, D.-Y., Chang, G.P., Li, A., DuPage, M., Tammela, T., Kerper, N.R., Farago, A.F., et al. (2015). Regulatory T Cells in Tumor-Associated Tertiary Lymphoid Structures Suppress Anti-tumor T Cell Responses. *Immunity* 43, 579–590.
- Juang, J.-H., Kuo, C.-H., Peng, S.-J., and Tang, S.-C. (2015). 3-D Imaging Reveals Participation of Donor Islet Schwann Cells and Pericytes in Islet Transplantation and Graft Neurovascular Regeneration. *EBioMedicine* 2, 109–119.
- Junyent, F., and Kremer, E.J. (2015). CAV-2-why a canine virus is a neurobiologist’s best friend. *Curr. Opin. Pharmacol.* 24, 86–93.

Jurrus, E., Hardy, M., Tasdizen, T., Fletcher, P.T., Koshevoy, P., Chien, C.-B., Denk, W., and Whitaker, R. (2009). Axon tracking in serial block-face scanning electron microscopy. *Med. Image Anal.* 13, 180–188.

Kim, S.-Y., Cho, J.H., Murray, E., Bakh, N., Choi, H., Ohn, K., Ruelas, L., Hubbert, A., McCue, M., Vassallo, S.L., et al. (2015a). Stochastic electrotransport selectively enhances the transport of highly electromobile molecules. *Proc. Natl. Acad. Sci. USA* 112, E6274–E6283.

Kitamura, K., Judkewitz, B., Kano, M., Denk, W., and Häusser, M. (2008). Targeted patch-clamp recordings and single-cell electroporation of unlabeled neurons in vivo. *Nat. Methods* 5, 61–67.

Kleinfeld, D., Bharioke, A., Blinder, P., Bock, D.D., Briggman, K.L., Chklovskii, D.B., Denk, W., Helmstaedter, M., Kaufhold, J.P., Lee, W.-C.A., et al. (2011). Large-scale automated histology in the pursuit of connectomes. *J. Neurosci.* 31, 16125–16138.

Knöpfel, T. (2012). Genetically encoded optical indicators for the analysis of neuronal circuits. *Nat. Rev. Neurosci.* 13, 687–700.

Kodandaramaiah, S.B., Franzesi, G.T., Chow, B.Y., Boyden, E.S., and Forest, C.R. (2012). Automated whole-cell patch-clamp electrophysiology of neurons in vivo. *Nat. Methods* 9, 585–587.

LaVail, J.H., Topp, K.S., Giblin, P.A., and Garner, J.A. (1997). Factors that contribute to the transneuronal spread of herpes simplex virus. *J. Neurosci. Res.* 49, 485–496.

Le Bihan, D., and Johansen-Berg, H. (2012). Diffusion MRI at 25: exploring brain tissue structure and function. *Neuroimage* 61, 324–341.

Lee, A.K., Manns, I.D., Sakmann, B., and Brecht, M. (2006). Whole-cell recordings in freely moving rats. *Neuron* 51, 399–407.

Lee, E., Choi, J., Jo, Y., Kim, J.Y., Jang, Y.J., Lee, H.M., Kim, S.Y., Lee, H.-J., Cho, K., Jung, N., et al. (2016). ACT-PRESTO: Rapid and consistent tissue clearing and labeling method for 3-dimensional (3D) imaging. *Sci. Rep.* 6, 18631.

Lima, S.Q., Hromádka, T., Znamenskiy, P., and Zador, A.M. (2009). PINP: a new method of tagging neuronal populations for identification during in vivo electrophysiological recording. *PLoS ONE* 4, e6099.

Lipski, J. (1981). Antidromic activation of neurones as an analytic tool in the study of the central nervous system. *J. Neurosci. Methods* 4, 1–32.

Liu, A.K.L., Hurry, M.E., Ng, O.T.-W., DeFelice, J., Lai, H.M., Pearce, R.K., Wong, G.T.-C., Chang, R.C.-C., and Gentleman, S.M. (2015a). Bringing CLARITY to the human brain: visualisation of Lewy pathology in three-dimensions. *Neuropathol. Appl. Neurobiol.* 10.1111/nan.12293.

Liu, C.Y., Dubé, P.E., Girish, N., Reddy, A.T., and Polk, D.B. (2015b). Optical reconstruction of murine colorectal mucosa at cellular resolution. *Am. J. Physiol. Gastrointest. Liver Physiol.* 308, G721–G735.

- Liu, Z., Gerner, M.Y., Van Panhuys, N., Levine, A.G., Rudensky, A.Y., and Germain, R.N. (2015c). Immune homeostasis enforced by co-localized effector and regulatory T cells. *Nature* 528, 225–230.
- Lo, L., and Anderson, D.J. (2011). A Cre-dependent, anterograde transsynaptic viral tracer for mapping output pathways of genetically marked neurons. *Neuron* 72, 938–950.
- Machon, O., Masek, J., Machonova, O., Krauss, S., and Kozmik, Z. (2015). Meis2 is essential for cranial and cardiac neural crest development. *BMC Dev. Biol.* 15, 40.
- Maksimovic, S., Nakatani, M., Baba, Y., Nelson, A.M., Marshall, K.L., Wellnitz, S.A., Firozi, P., Woo, S.-H., Ranade, S., Patapoutian, A., and Lumpkin, E.A. (2014). Epidermal Merkel cells are mechanosensory cells that tune mammalian touch receptors. *Nature* 509, 617–621.
- Moalli, F., Proulx, S.T., Schwendener, R., Detmar, M., Schlapbach, C., and Stein, J.V. (2015). Intravital and whole-organ imaging reveals capture of melanoma-derived antigen by lymph node subcapsular macrophages leading to widespread deposition on follicular dendritic cells. *Front. Immunol.* 6, 114.
- Mundell, N.A., Beier, K.T., Pan, Y.A., Lapan, S.W., Göz Aytürk, D., Berezovskii, V.K., Wark, A.R., Drokhlyansky, E., Bielecki, J., Born, R.T., et al. (2015). Vesicular stomatitis virus enables gene transfer and transsynaptic tracing in a wide range of organisms. *J. Comp. Neurol.* 523, 1639–1663.
- Muñoz, W., Tremblay, R., and Rudy, B. (2014). Channelrhodopsin-assisted patching: in vivo recording of genetically and morphologically identified neurons throughout the brain. *Cell Rep.* 9, 2304–2316.
- Murray, E., Cho, J.H., Goodwin, D., Ku, T., Swaney, J., Kim, S.-Y., Choi, H., Park, Y.-G., Park, J.-Y., Hubbert, A., et al. (2015). Simple, Scalable Proteomic Imaging for High-Dimensional Profiling of Intact Systems. *Cell* 163, 1500–1514.
- Noguchi, M., Sumiyama, K., and Morimoto, M. (2015). Directed Migration of Pulmonary Neuroendocrine Cells toward Airway Branches Organizes the Stereotypic Location of Neuroepithelial Bodies. *Cell Rep.* 13, 2679–2686.
- Oshimori, N., Oristian, D., and Fuchs, E. (2015). TGF-Beta promotes heterogeneity and drug resistance in squamous cell carcinoma. *Cell* 160, 963–976.
- Palmer, W.M., Martin, A.P., Flynn, J.R., Reed, S.L., White, R.G., Furbank, R.T., and Grof, C.P.L. (2015). PEA-CLARITY: 3D molecular imaging of whole plant organs. *Sci. Rep.* 5, 13492.
- Papa, S., Caron, I., Erba, E., Panini, N., De Paola, M., Mariani, A., Colombo, C., Ferrari, R., Pozzer, D., Zanier, E.R., et al. (2016). Early modulation of pro-inflammatory microglia by minocycline loaded nanoparticles confers long lasting protection after spinal cord injury. *Biomaterials* 75, 13–24.
- Pascoli, V., Turiault, M., and Lüscher, C. (2012). Reversal of cocaine-evoked synaptic potentiation resets drug-induced adaptive behaviour. *Nature* 481, 71–75.
- Peng, T., Frank, D.B., Kadzik, R.S., Morley, M.P., Rathi, K.S., Wang, T., Zhou, S., Cheng, L., Lu, M.M., and Morrissey, E.E. (2015). Hedgehog actively maintains adult lung quiescence and regulates repair and regeneration. *Nature* 526, 578–582.

Plummer, N.W., Evsyukova, I.Y., Robertson, S.D., de Marchena, J., Tucker, C.J., and Jensen, P. (2015). Expanding the power of recombinase-based labeling to uncover cellular diversity. *Development* 142, 4385–4393.

Poldrack, R.A., and Farah, M.J. (2015). Progress and challenges in probing the human brain. *Nature* 526, 371–379

Ranjan, A., and Mallick, B.N. (2010). A modified method for consistent and reliable Golgi-cox staining in significantly reduced time. *Front. Neurol.* 1, 157.

Roccaro, A.M., Mishima, Y., Sacco, A., Moschetta, M., Tai, Y.-T., Shi, J., Zhang, Y., Reagan, M.R., Huynh, D., Kawano, Y., et al. (2015). CXCR4 Regulates Extra-Medullary Myeloma through Epithelial-Mesenchymal-Transition-like Transcriptional Activation. *Cell Rep.* 12, 622–635.

Saboor, F., Reckmann, A.N., Tomczyk, C.U.M., Peters, D.M., Weissmann, N., Kaschtanow, A., Schermuly, R.T., Michurina, T.V., Enikolopov, G., Müller, D., et al. (2015). Nestin-expressing vascular wall cells drive development of pulmonary hypertension. *Eur. Respir. J. ERJ-00574–ERJ-02015.*

Soderblom, C., Lee, D.-H., Dawood, A., Carballosa, M., Jimena Santamaria, A., Benavides, F.D., Jergova, S., Grumbles, R.M., Thomas, C.K., Park, K.K., et al. (2015). 3D Imaging of Axons in Transparent Spinal Cords from Rodents and Nonhuman Primates. *eNeuro* 2.

Spence, R.D., Kurth, F., Itoh, N., Mongerson, C.R.L., Wailes, S.H., Peng, M.S., and MacKenzie-Graham, A.J. (2014). Bringing CLARITY to gray matter atrophy. *Neuroimage* 101, 625–632.

St-Pierre, F., Marshall, J.D., Yang, Y., Gong, Y., Schnitzer, M.J., and Lin, M.Z. (2014). High-fidelity optical reporting of neuronal electrical activity with an ultrafast fluorescent voltage sensor. *Nat. Neurosci.* 17, 884–889.

Sun, N., Cassell, M.D., and Perlman, S. (1996). Anterograde, transneuronal transport of herpes simplex virus type 1 strain H129 in the murine visual system. *J. Virol.* 70, 5405–5413.

Sylwestrak, E.L., Rajasethupathy, P., Wright, M.A., Jaffe, A., and Deisseroth, K. (2016). Multiplexed intact-tissue transcriptional analysis at cellular resolution. *Cell* 164, 792–804.

Tainaka, K., Kubota, S.I., Suyama, T.Q., Susaki, E.A., Perrin, D., Ukai-Tadenuma, M., Ukai, H., and Ueda, H.R. (2014). Whole-body imaging with single-cell resolution by tissue decolorization. *Cell* 159, 911–924.

Theofilas, P., Polichiso, L., Wang, X., Lima, L.C., Alho, A.T.L., Leite, R.E.P., Suemoto, C.K., Pasqualucci, C.A., Jacob-Filho, W., Heinsen, H., and Grinberg, L.T.; Brazilian Aging Brain Study Group (2014). A novel approach for integrative studies on neurodegenerative diseases in human brains. *J. Neurosci. Methods* 226, 171–183.

Tsujioka, H., Kunieda, T., Katou, Y., Shirahige, K., and Kubo, T. (2015). Unique gene expression profile of the proliferating *Xenopus* tadpole tail blastema cells deciphered by RNA-sequencing analysis. *PLoS ONE* 10, e0111655.

Ugolini, G., Kuypers, H.G., and Simmons, A. (1987). Retrograde transneuronal transfer of herpes simplex virus type 1 (HSV 1) from motoneurons. *Brain Res.* 422, 242–256.

- Unal, G., Joshi, A., Viney, T.J., Kis, V., and Somogyi, P. (2015). Synaptic Targets of Medial Septal Projections in the Hippocampus and Extrahippocampal Cortices of the Mouse. *J. Neurosci.* 35, 15812–15826.
- Walz, W., Boulton, A., and Baker, G. (2002). *Patch-Clamp Analysis* (New Jersey: Humana Press).
- Wang, Q., Henry, A.M., Harris, J.A., Oh, S.W., Joines, K.M., Nyhus, J., Hirokawa, K.E., Dee, N., Mortrud, M., Parry, S., et al. (2014). Systematic comparison of adeno-associated virus and biotinylated dextran amine reveals equivalent sensitivity between tracers and novel projection targets in the mouse brain. *J. Comp. Neurol.* 522, 1989–2012.
- Ward, S., Thomson, N., White, J.G., and Brenner, S. (1975). Electron microscopical reconstruction of the anterior sensory anatomy of the nematode *Caenorhabditis elegans*. *J. Comp. Neurol.* 160, 313–337.
- Weber, T.G., Osl, F., Renner, A., Pöschinger, T., Galbán, S., Rehemtulla, A., and Scheuer, W. (2014). Apoptosis imaging for monitoring DR5 antibody accumulation and pharmacodynamics in brain tumors noninvasively. *Cancer Res.* 74, 1913–1923.
- Yang, B., Treweek, J.B., Kulkarni, R.P., Deverman, B.E., Chen, C.-K., Lubeck, E., Shah, S., Cai, L., and Gradinaru, V. (2014). Single-cell phenotyping within transparent intact tissue through whole-body clearing. *Cell* 158, 945–958.
- Zapiec, B., and Mombaerts, P. (2015). Multiplex assessment of the positions of odorant receptor-specific glomeruli in the mouse olfactory bulb by serial two-photon tomography. *Proc. Natl. Acad. Sci. USA* 112, E5873–E5882.
- Zemanick, M.C., Strick, P.L., and Dix, R.D. (1991). Direction of transneuronal transport of herpes simplex virus 1 in the primate motor system is strain-dependent. *Proc. Natl. Acad. Sci. USA* 88, 8048–8051.
- Zhang, M.D., Tortoriello, G., Hsueh, B., Tomer, R., Ye, L., Mitsios, N., Borgius, L., Grant, G., Kiehn, O., Watanabe, M., et al. (2014). Neuronal calcium-binding proteins 1/2 localize to dorsal root ganglia and excitatory spinal neurons and are regulated by nerve injury. *Proc. Natl. Acad. Sci. USA* 111, E1149–E1158.
- Zheng, H., and Rinaman, L. (2015). Simplified CLARITY for visualizing immunofluorescence labeling in the developing rat brain. *Brain Struct. Funct.* Published online March 14, 2015. 10.1007/s00429-015-1020-0.
- Zhu, Y., Soderblom, C., Krishnan, V., Ashbaugh, J., Bethea, J.R., and Lee, J.K. (2015). Hematogenous macrophage depletion reduces the fibrotic scar and increases axonal growth after spinal cord injury. *Neurobiol. Dis.* 74, 114–125.
- Ziętara, N., Łyszkiwicz, M., Puchałka, J., Witzlau, K., Reinhardt, A., Förster, R., Pabst, O., Prinz, I., and Krueger, A. (2015). Multicongenic fate mapping quantification of dynamics of thymus colonization. *J. Exp. Med.* 212, 1589–1601.
- Zou, M., De Koninck, P., Neve, R.L., and Friedrich, R.W. (2014). Fast gene transfer into the adult zebrafish brain by herpes simplex virus 1 (HSV-1) and electroporation: methods and optogenetic applications. *Front. Neural Circuits* 8, 41.
